# Supplementary material for: A molecular ferroelectrics induced electroactive β-phase in solution processed PVDF films for flexible piezoelectric sensors
Source: Royal Society of Chemistry journal article supplement (doi:10.1039/c8tc05090b), 2019-01-01
Supplement: c8tc05090b1.pdf [file c8tc05090b1.pdf]

## Electronic supplementary information for

# Molecular ferroelectrics induced electroactive $\beta$ -phase in solution processed PVDF films for flexible piezoelectric sensors

Qingqing Li,<sup>a,b,c</sup> Wanyu Ke,<sup>a,b</sup> Tongxin Chang,<sup>a,b</sup> Zhijun Hu<sup>\*a,b,c</sup>

<sup>a</sup> School of Optoelectronics Science and Engineering & Collaborative Innovation Center of Suzhou Nano Science and Technology, Soochow University, Suzhou 215006, China

<sup>b</sup> Key Lab of Advanced Optical Manufacturing Technologies of Jiangsu Province & Key lab of Modern Optical Technologies of Education Ministry of China, Soochow University, Suzhou 215006, China

<sup>c</sup> Center for Soft Condensed Matter Physics and Interdisciplinary Research, Soochow University, Suzhou 215123, China

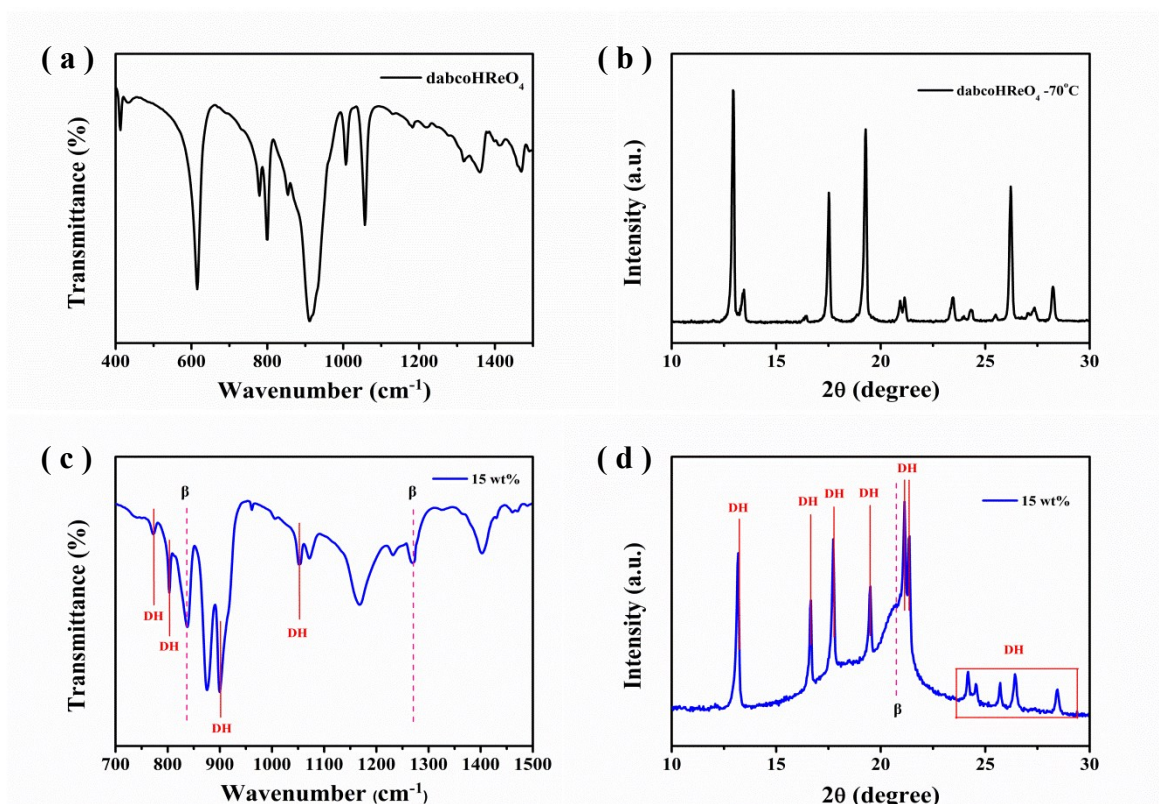

**Figure S1.** (a) (c) FT-IR spectra of the dabcoHReO<sub>4</sub> and the dabcoHReO<sub>4</sub>-PVDF composite film (15 wt%). (b) (d) XRD patterns of the dabcoHReO<sub>4</sub> (at 70 °C) and the dabcoHReO<sub>4</sub>-PVDF composite film (15 wt%)

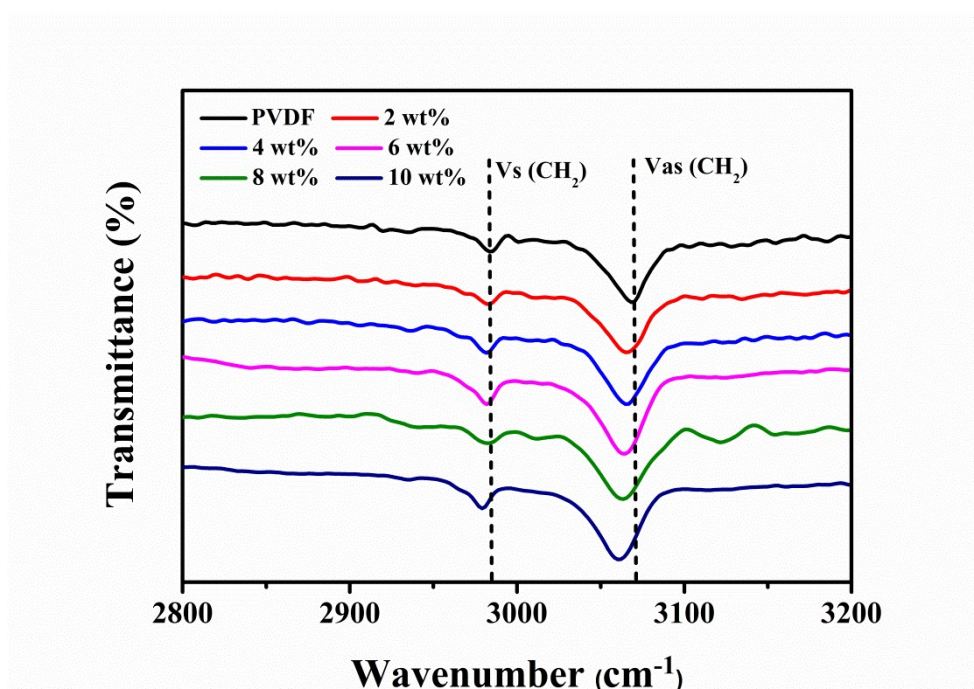

**Figure S2.** FT-IR spectra of the pure PVDF film and the dabcoHReO<sub>4</sub>-PVDF composite films with different DH loadings in the region of 2800-3200 cm<sup>-1</sup>.

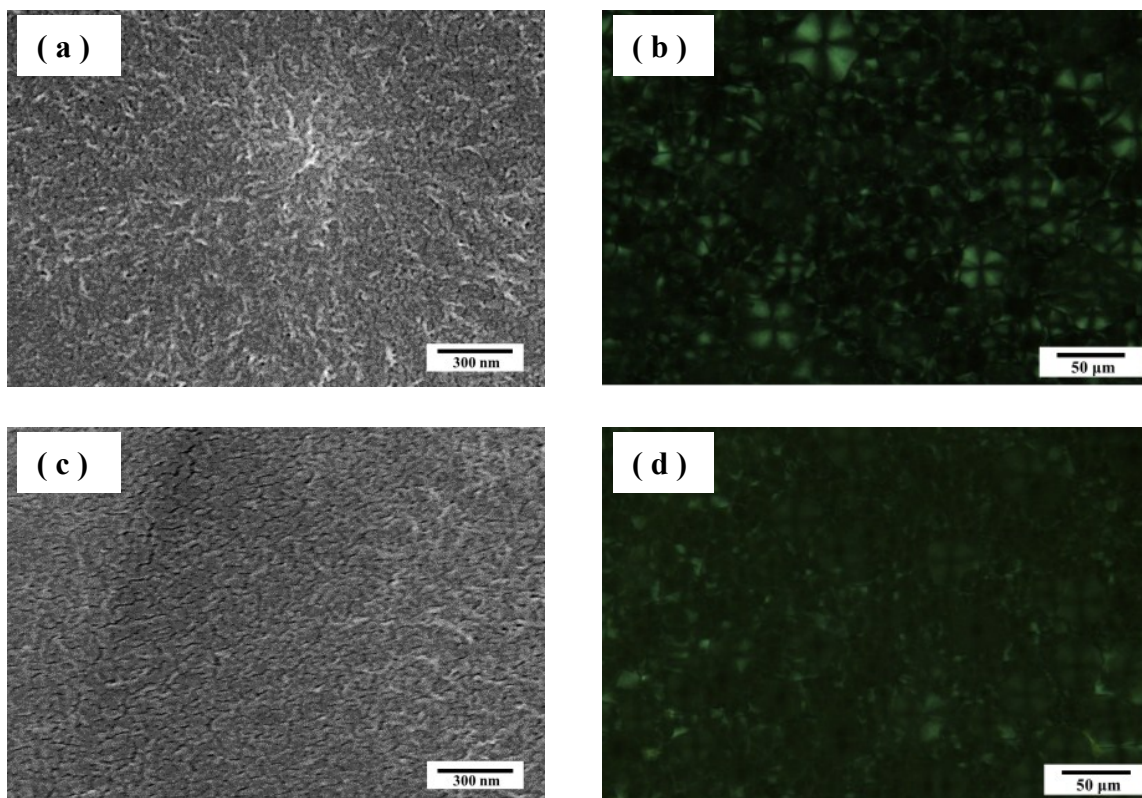

**Figure S3.** (a) SEM image of the dabcoHReO<sub>4</sub>-PVDF composite film (2 wt%) at 300 nm scale. (b) POM image of the dabcoHReO<sub>4</sub>-PVDF composite film (2 wt%) at 50 μm scale. (c) SEM image of the dabcoHReO<sub>4</sub>-PVDF composite film (6 wt%) at 300 nm scale. (d) POM image of the dabcoHReO<sub>4</sub>-PVDF composite film (6 wt%) at 50 μm scale.

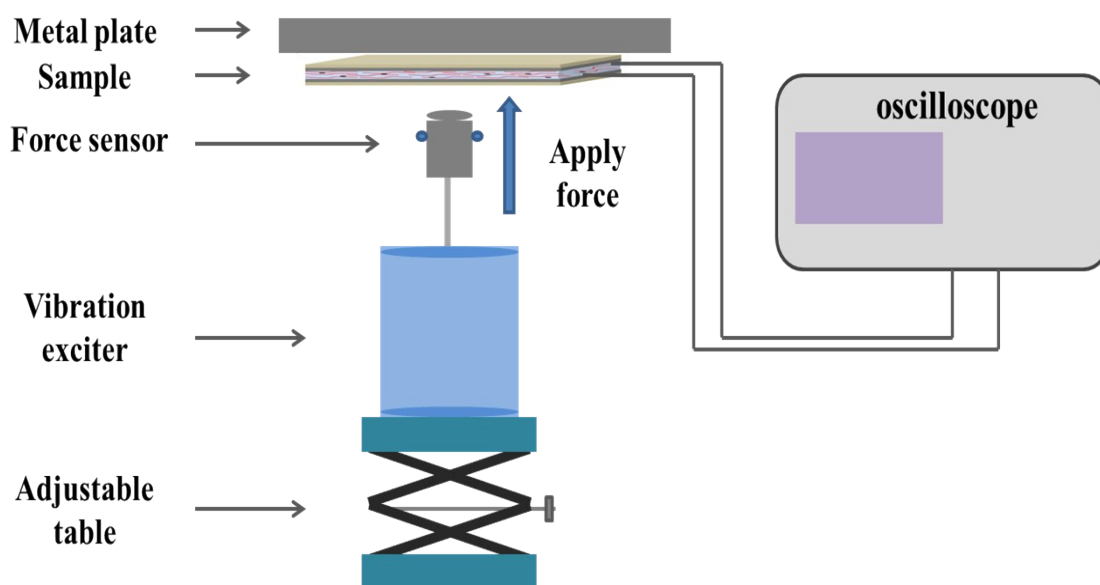

**Figure S4.** The simple experimental schematic illustration of measuring piezoelectric sensors under the periodical mechanical force.

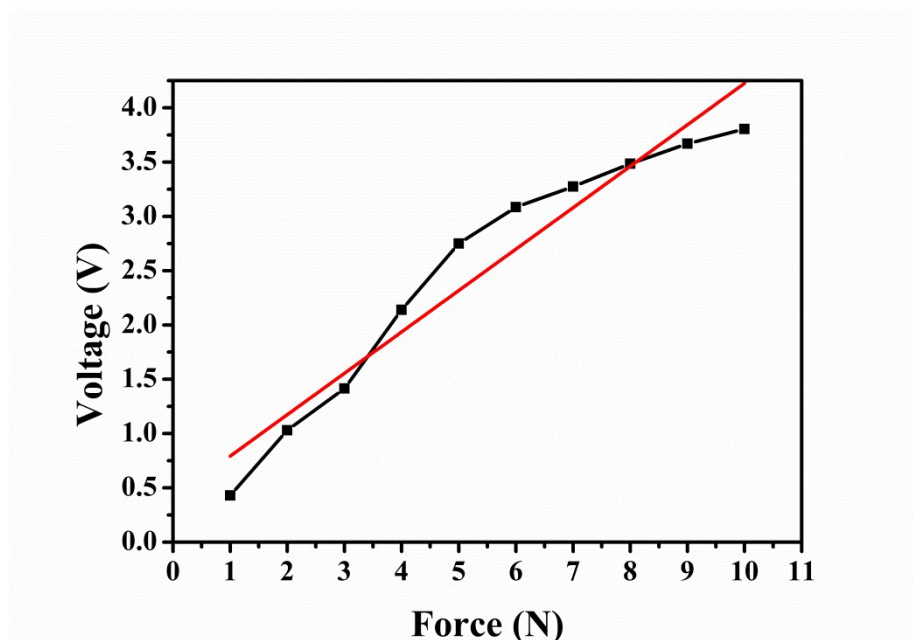

**Figure S5.** The linear fitting of experiment data (the relationship between the average output voltage and the applied force under a given frequency of 8Hz).
